# Supplementary material
Source: publisher figshare collection journal article supplement (https://frontiersin.figshare.com/ndownloader/files/28620000)
Supplement: Supplementary file 1 [file 28620000]

# The biodiversity and distribution of abyssal benthic foraminifera and their possible ecological roles: a synthesis across the Clarion-Clipperton Zone.

Andrew J. Gooday1,2*, Franck Lejzerowicz3,4, Aurélie Goineau1, Maria Holzmann5, Olga Kamenskaya6, Hiroshi Kitazato7, Swee-Cheng Lim8, Jan Pawlowski5,9,10, Teresa Radziejewska11, Zofia Stachowska11, Brygida Wawrzyniak-Wydrowska11

# Supplementary Material

Supplementary Figure S2

*
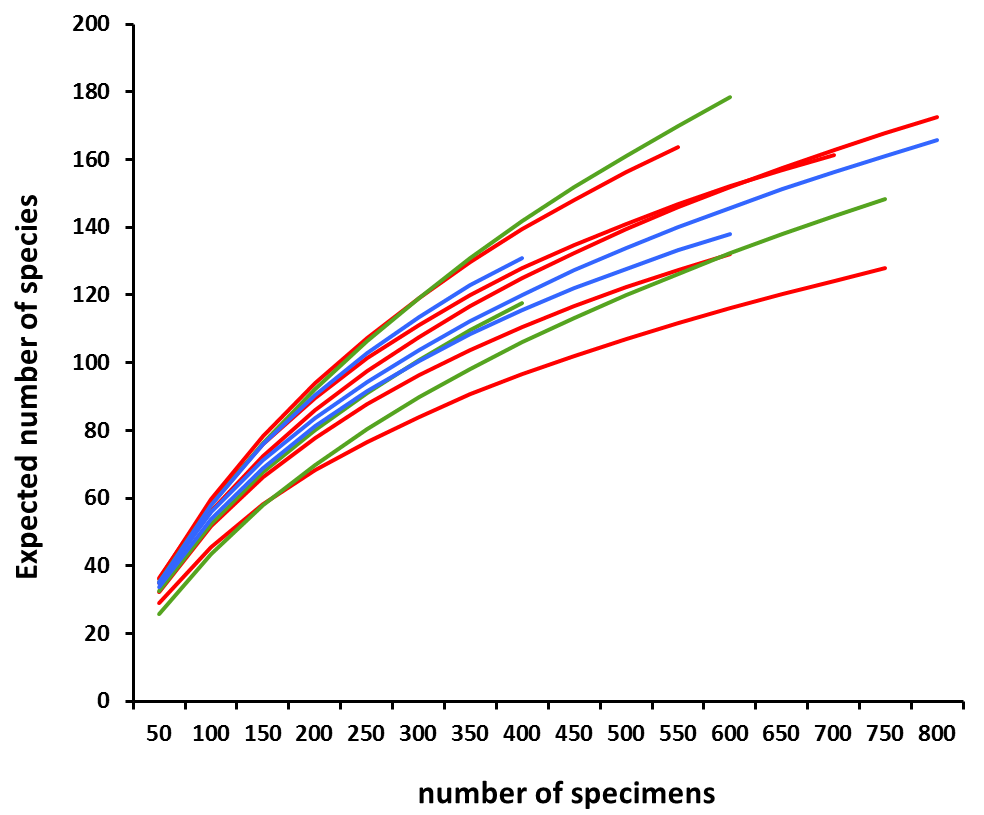
*

**Supplementary Figure S2.** Rarefaction curves for 11 megacorer samples (0-1 cm layer, >150-µm fraction) from UK-1 Strata A (red) and B (green) and OMS Stratum (blue). Data from Goineau and Gooday (2019).
